# Supplementary material for: Effect of Foot Orthoses and Shoes in Parkinson’s Disease Patients: A PRISMA Systematic Review
Source: MDPI journal article supplement (doi:10.3390/jpm11111136), 2021-11-02
Supplement: s1 [file s1]

## **Supplementary: Search strategy**

### **Pubmed**

- ("Parkinson Disease"[Mesh]) AND "Foot Orthoses"[Mesh]
- ("Parkinson Disease"[Mesh]) AND "Shoes"[Mesh]
- foot orthoses AND parkinson
- insoles AND parkinson
- shoes AND parkinson
- foot wear AND parkinson

### **Scopus**

- "Parkinson" AND "insole"
- "Parkinson" AND "foot orthoses"
- "shoes" AND "parkinson"
- "foot wear" AND "parkinson"

### **Cochrane Reviews**

- "parkinson" AND "foot wear"
- "insoles" AND "parkinson"
- "shoes" AND "parkinson"
- "foot orthoses" AND "parkinson"

### **Dialnet**

- plantillas AND parkinson
- ortesis plantares AND parkinson
- calzado AND parkinson
- zapato AND parkinson
- zapato AND parkinson

### **Web of Science**

- foot orthoses AND parkinson
- foot wear AND parkinson
- insole AND parkinson
- shoes AND parkinson
